# Supplementary material for: Phase I study of cabazitaxel plus cisplatin in patients with advanced solid tumors: study to evaluate the impact of cytochrome P450 3A inhibitors (aprepitant, ketoconazole) or inducers (rifampin) on the pharmacokinetics of cabazitaxel
Source: Springer Nature journal article supplement (doi:10.1007/s00280-014-2572-z), 2014-10-12
Supplement: MOESM1 [file 280_2014_2572_MOESM1_ESM.pdf]

## Electronic Supplementary Material

### Phase I study of cabazitaxel plus cisplatin in patients with advanced solid tumors: study to evaluate the impact of cytochrome P450 3A inhibitors (aprepitant, ketoconazole) or inducers (rifampin) on the pharmacokinetics of cabazitaxel

#### Authors:

John Sarantopoulos<sup>1</sup>, Alain C. Mita<sup>1,2</sup>, James L. Wade<sup>3</sup>, John C. Morris<sup>4</sup>, Olivier Rixe<sup>5</sup>, Monica M. Mita<sup>1,2</sup>, Jean-François Dedieu<sup>6</sup>, Claudine Wack<sup>6</sup>, Laurent Kassalow<sup>7</sup>, A. Craig Lockhart<sup>8</sup>

<sup>1</sup>Institute for Drug Development, Cancer Therapy and Research Center, University of Texas Health Science Center San Antonio, San Antonio, TX, USA; <sup>2</sup>Samuel Oschin Comprehensive Cancer Institute, Cedars-Sinai Medical Center, Los Angeles, CA, USA; <sup>3</sup>Cancer Care Center of Decatur, Decatur, IL, USA; <sup>4</sup>Division of Hematology-Oncology, Department of Medicine, University of Cincinnati Cancer Institute, Cincinnati, OH, USA; <sup>5</sup>Division of Hematology/Oncology, GRU Cancer Center, Georgia Regents University, Augusta, GA, USA; <sup>6</sup>Sanofi, Chilly-Mazarin, France; <sup>7</sup>Sanofi, Bridgewater, NJ, USA; <sup>8</sup>Siteman Cancer Center, Washington University School of Medicine, St. Louis, MO, USA.

#### Keywords:

Cabazitaxel; aprepitant; ketoconazole; rifampin; cytochrome P450 3A; drug–drug interactions

#### Corresponding author:

Dr. John Sarantopoulos, MD

Institute for Drug Development

Cancer Therapy & Research Center at UTHSCSA

4th Floor, Zeller Building

7979 Wurzbach Road

San Antonio, TX 78229

Telephone: (001) 210 450 1785

Fax: (001) 210 692 7502

Email: [sarantopoulo@uthscsa.edu](mailto:sarantopoulo@uthscsa.edu)

**Online Resource 1:** Mean plasma concentration–time profiles of cabazitaxel at Cycle 1 (without co-administered interacting drug) and Cycle 2 (with co-administered interacting drug) for a) aprepitant, b) ketoconazole and c) rifampin. LOQ = limit of quantification.

a)

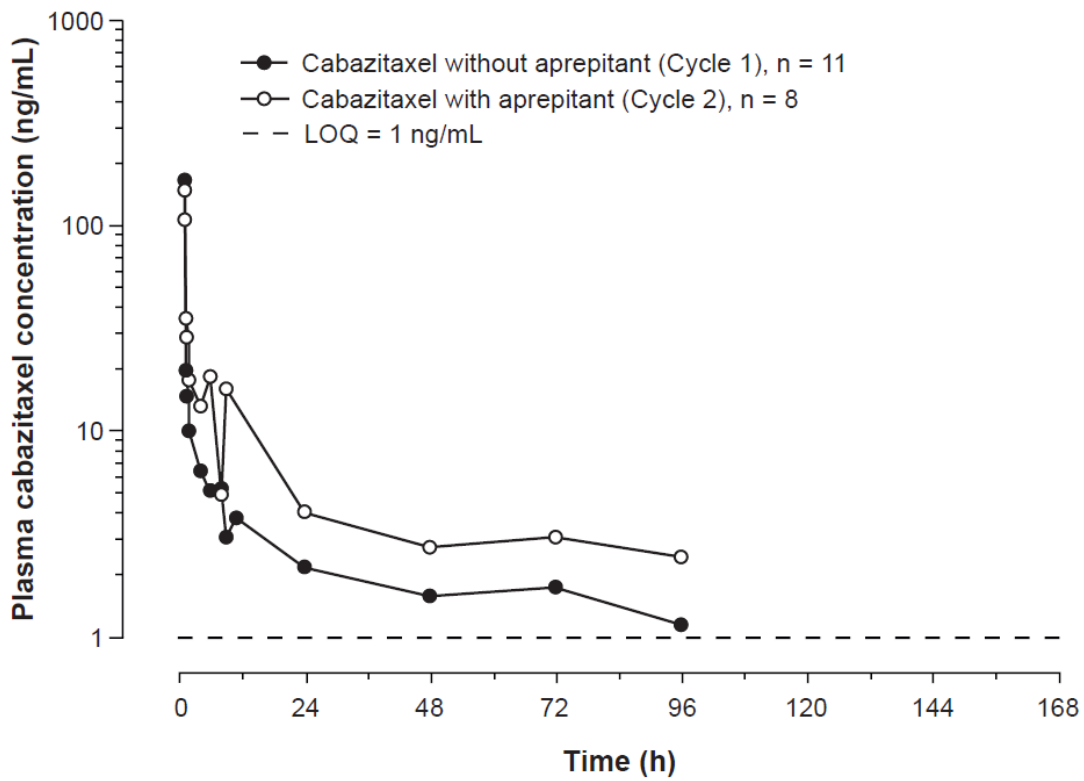

b)

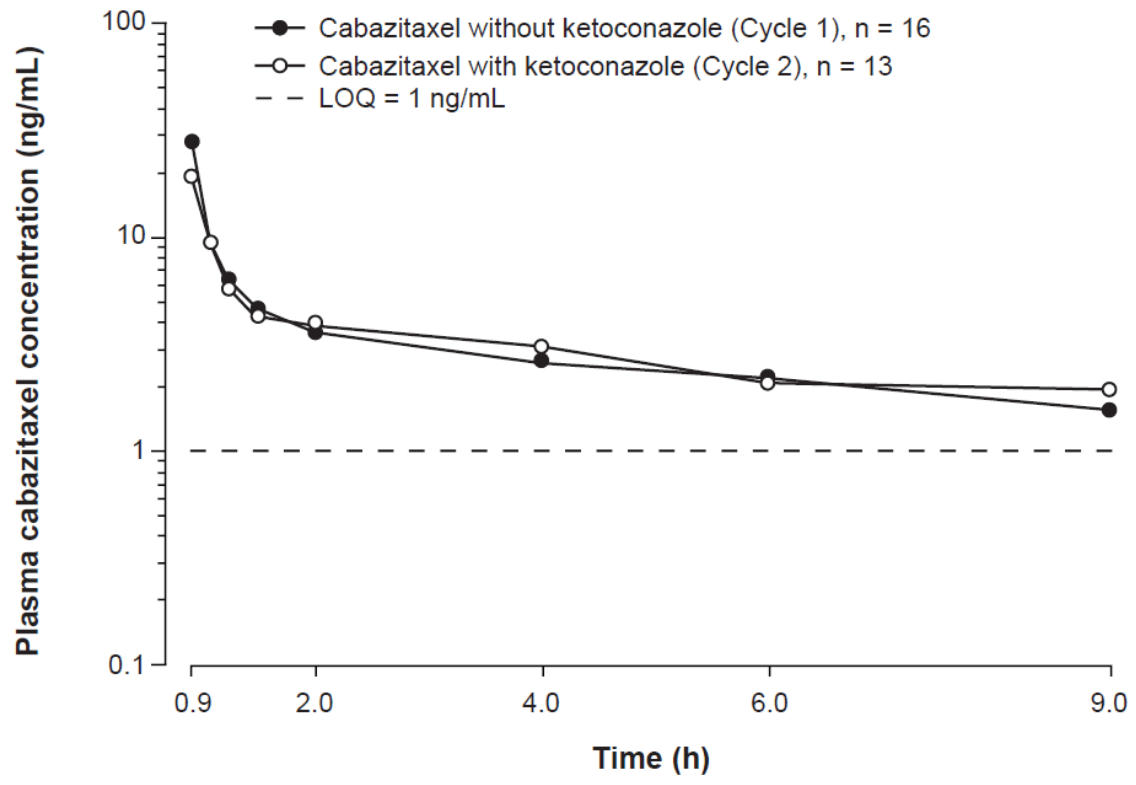

c)

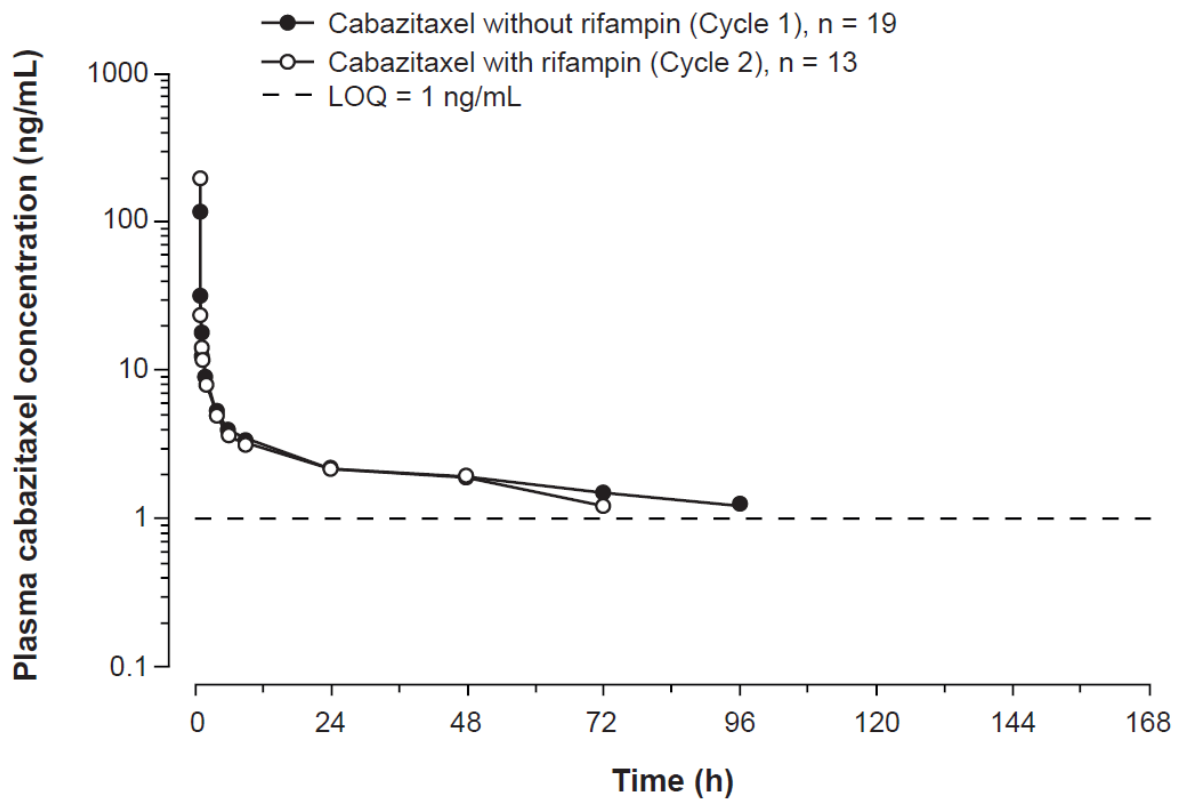

**Online Resource 2:** Hematologic abnormalities during on-treatment period in Parts 2, 3 and 4, presented as worst grade by patient (all-treated population)

| Abnormality      | Part 2, all-treated population (N = 15) |                   | Part 3, all-treated population (N = 25) |                   | Part 4, all-treated population (N = 23) |                   |
|------------------|-----------------------------------------|-------------------|-----------------------------------------|-------------------|-----------------------------------------|-------------------|
|                  | Grade ≥ 3, n (%)                        | All grades, n (%) | Grade ≥ 3, n (%)                        | All grades, n (%) | Grade ≥ 3, n (%)                        | All grades, n (%) |
| Anemia           | 5 (33.3)                                | 12 (80.0)         | 6 (24.0)                                | 25 (100)          | 3 (13.0)                                | 23 (100)          |
| Leukopenia       | 10 (66.7)                               | 14 (93.3)         | 8 (32.0)                                | 15 (60.0)         | 11 (47.8)                               | 22 (95.7)         |
| Lymphopenia      | 6 (40.0)                                | 11 (73.3)         | 9 (36.0)                                | 22 (88.0)         | 11 (47.8)                               | 21 (91.3)         |
| Neutropenia      | 11 (73.3)                               | 13 (86.7)         | 7 (28.0)                                | 10 (40.0)         | 14 (60.9)                               | 19 (82.6)         |
| Thrombocytopenia | 2 (13.3)                                | 13 (86.7)         | 2 (8.0)                                 | 16 (64.0)         | 3 (13.0)                                | 16 (69.6)         |

Does not include toxicity Grade 0 or missing. Data are based on laboratory values, not AEs.
